# Supplementary material for: Water defluoridation using Al/Fe/Ti ternary metal oxide-loaded activated carbon by capacitive deionization
Source: Royal Society of Chemistry journal article supplement (doi:10.1039/d2ew00614f), 2023-01-01
Supplement: d2ew00614f1.pdf [file d2ew00614f1.pdf]

## WATER DEFLUORIDATION USING TERNARY METAL OXIDE-LOADED ACTIVATED CARBON BY CAPACITIVE DEIONIZATION

**Tusekile Alfredy<sup>1,2</sup>, Joyce Elisadiki<sup>3</sup>, Young-Deuk Kim<sup>4,5</sup>, Yusufu Abeid Chande Jande<sup>1,2\*</sup>**

<sup>1</sup>Department of Materials and Energy Sciences and Engineering, The Nelson Mandela African Institution of Science and Technology, P.O. Box 447 Arusha, Tanzania. Email address: tusekile.alfredy@nm-aist.ac.tz; yusufu.jande@nm-aist.ac.tz

<sup>2</sup>Water Infrastructure and Sustainable Energy Futures (WISE-Futures) Centre, The Nelson Mandela African Institution of Science and Technology, Nelson Mandela Road, Tengeru, P.O. Box 9124 Nelson Mandela, Arusha, Tanzania. Email address: yusufu.jande@nm-aist.ac.tz

<sup>3</sup>Department of Physics, College of Natural and Mathematical Sciences, University of Dodoma, P.O. Box 338 Dodoma, Tanzania. Email address: joyce.lyimo2@udom.ac.tz

<sup>4</sup>Department of Mechanical Engineering, Hanyang University, 55 Hanyangdaehak-ro, Sangnok-gu, Ansan, Gyeonggi-do 15588, Republic of Korea. Email address: youngdeuk@hanyang.ac.kr

<sup>5</sup>BK21 FOUR ERICA-ACE Center, Hanyang University, 55 Hanyangdaehak-ro, Sangnok-gu, Ansan, Gyeonggi-do 15588, Republic of Korea. Email address: youngdeuk@hanyang.ac.kr

**Table S1:** Level of various independent variables at coded values of response surface methodology experimental design

| Symbol | Independent variables | Coded levels |     |    |
|--------|-----------------------|--------------|-----|----|
|        |                       | -1           | 0   | +1 |
| Al     | Aluminum salt amount  | 1            | 2.5 | 4  |
| Fe     | Iron salt amount      | 1            | 2.5 | 4  |
| Ti     | Titanium salt amount  | 1            | 2.5 | 4  |

**Table S2:** Experimental design conditions and response of each experimental run.

| Run | Ratio of activated carbon (g) | Ratio of aluminium salt (g) | Ratio of Iron salt (g) | Ratio of titanium salt (g) | Removal efficiency (%) |
|-----|-------------------------------|-----------------------------|------------------------|----------------------------|------------------------|
| 1   | 1                             | 1                           | 1                      | 2.5                        | 35                     |
| 2   | 1                             | 4                           | 1                      | 2.5                        | 70.4                   |
| 3   | 1                             | 1                           | 4                      | 2.5                        | 47.7                   |
| 4   | 1                             | 4                           | 4                      | 2.5                        | 74.4                   |
| 5   | 1                             | 1                           | 2.5                    | 1                          | 47                     |
| 6   | 1                             | 4                           | 2.5                    | 1                          | 73.7                   |
| 7   | 1                             | 1                           | 2.5                    | 4                          | 40                     |
| 8   | 1                             | 4                           | 2.5                    | 4                          | 79                     |
| 9   | 1                             | 2.5                         | 1                      | 1                          | 65                     |
| 10  | 1                             | 2.5                         | 4                      | 1                          | 74                     |
| 11  | 1                             | 2.5                         | 1                      | 4                          | 59                     |
| 12  | 1                             | 2.5                         | 4                      | 4                          | 63                     |
| 13  | 1                             | 2.5                         | 2.5                    | 2.5                        | 64                     |
| 14  | 1                             | 2.5                         | 2.5                    | 2.5                        | 69                     |
| 15  | 1                             | 2.5                         | 2.5                    | 2.5                        | 67                     |

**Table S3:** Fit summary of the model

| Source           | Sequential p-value | Lack of Fit p-value | Adjusted R <sup>2</sup> | Predicted R <sup>2</sup> |                  |
|------------------|--------------------|---------------------|-------------------------|--------------------------|------------------|
| Linear           | < 0.0001           | 0.1580              | 0.8302                  | 0.7463                   |                  |
| 2FI              | 0.6266             | 0.1320              | 0.8101                  | 0.5564                   |                  |
| <b>Quadratic</b> | <b>0.0210</b>      | <b>0.3889</b>       | <b>0.9500</b>           | <b>0.7829</b>            | <b>Suggested</b> |
| Cubic            | 0.3889             |                     | 0.9650                  |                          | <b>Aliased</b>   |
